# Supplementary material for: Metabolic Changes in Zebrafish Larvae Infected with Mycobacterium marinum: A Widely Targeted Metabolomic Analysis
Source: MDPI journal article supplement (doi:10.3390/metabo15070449), 2025-07-04
Supplement: s1 [file Supplementary Materials.pdf › Supplementary Materials.pdf]

## **Supplementary Materials**

**Supplementary Table 1.** Raw data table of all metabolites

**Supplementary Table 2.** Data table for screening differential metabolites, including VIP, P - value, FDR, FC, Log2FC parameters

**Supplementary Table 3.** Data table of 61 differential metabolites
